# Supplementary material for: Enrichment and isolation of Flavobacterium strains with tolerance to high concentrations of cesium ion
Source: PubMed Central journal article supplement (PMC4756683; doi:10.1038/srep20041), 2016-02-17
Supplement: srep20041-s1.pdf [file srep20041-s1.pdf]

1 Enrichment and isolation of *Flavobacterium* strains with tolerance to  
2 high concentrations of cesium ion

3

4 Authors:

5 Souichiro Kato<sup>1,2,3\*</sup>, Eri Goya<sup>1</sup>, Michiko Tanaka<sup>1</sup>, Wataru Kitagawa<sup>1,2</sup>, Yoshitomo Kikuchi<sup>1,2</sup>,  
6 Kozo Asano<sup>1</sup>, Yoichi Kamagata<sup>1,2</sup>

7

8 <sup>1</sup>*Division of Applied Bioscience, Graduate School of Agriculture, Hokkaido University, Kita-9*  
9 *Nishi-9, Kita-ku, Sapporo, Hokkaido 060-8589, Japan*

10 <sup>2</sup>*Bioproduction Research Institute, National Institute of Advanced Industrial Science and*  
11 *Technology (AIST), 2-17-2-1 Tsukisamu-Higashi, Toyohira-ku, Sapporo, Hokkaido 062-8517,*  
12 *Japan*

13 <sup>3</sup>*Research Center for Advanced Science and Technology, The University of Tokyo, 4-6-1*  
14 *Komaba, Meguro-ku, Tokyo 153-8904, Japan*

15

16 \*For correspondence. E-mail s.katou@aist.go.jp; Tel (+81) 11 857 8968; Fax (+81) 11 857  
17 8915

18

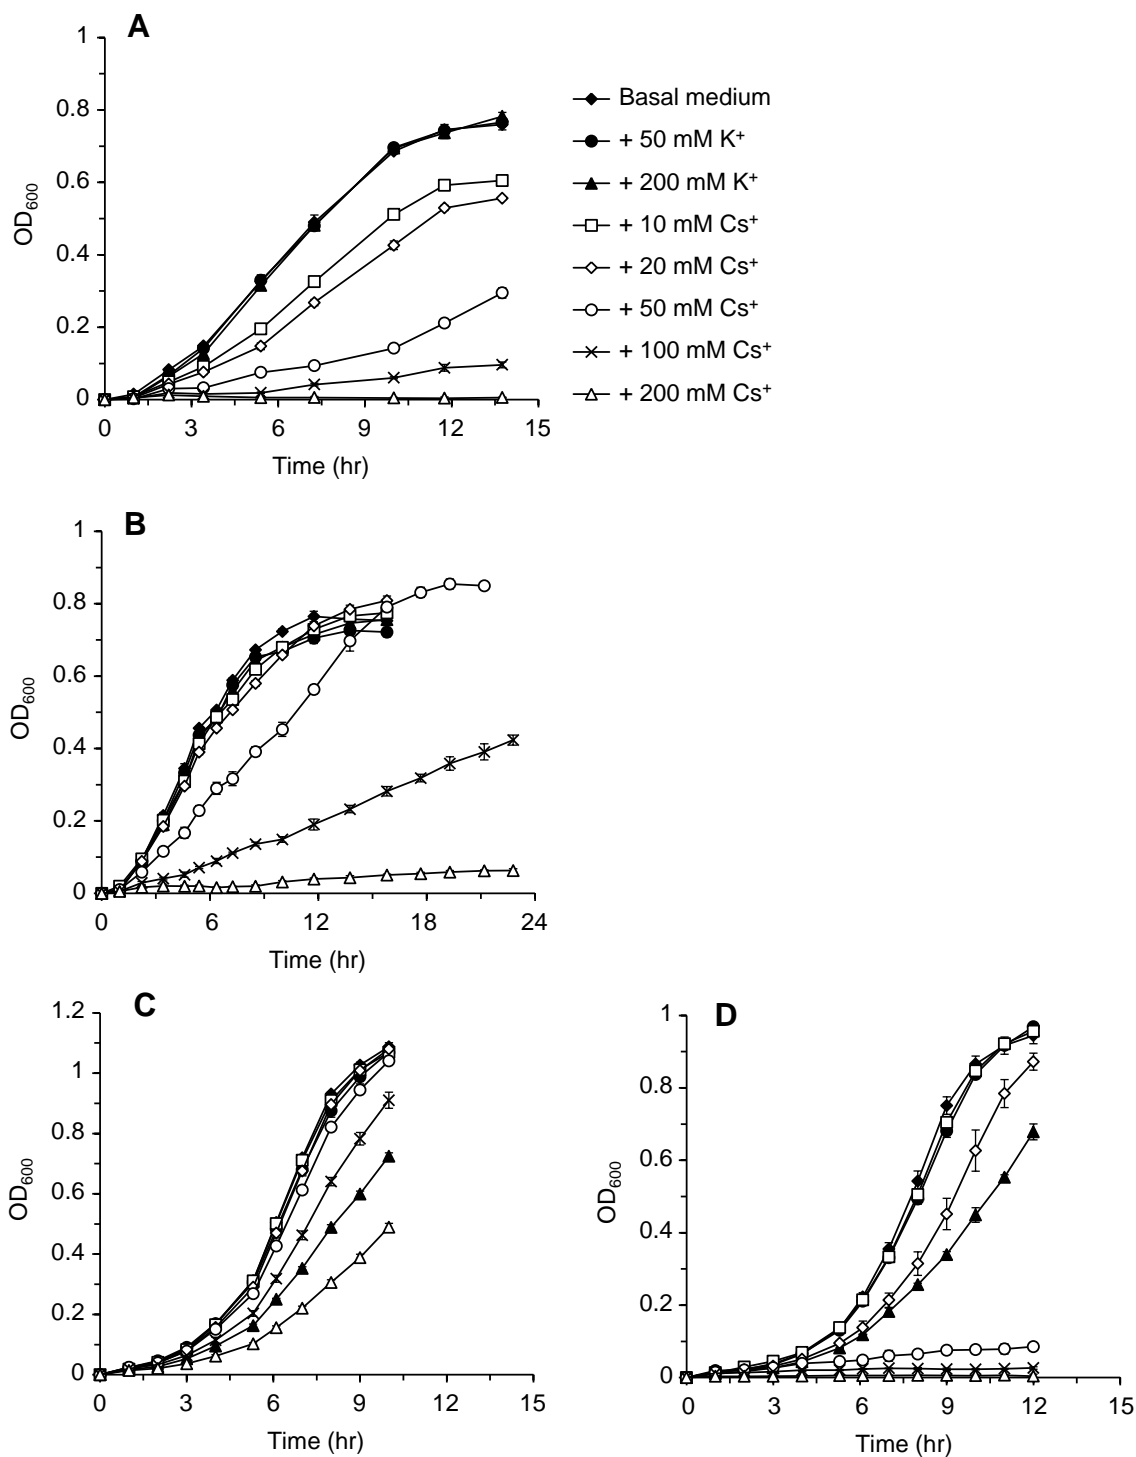

**FIG S1** Growth curves of (A) *E. coli*, (B) *B. subtilis*, (C) the Cs<sup>+</sup>-tolerant isolate (strain 200Cs-4) and (D) the closest relative of the isolate (*F. chungbukense* CS100) with different concentrations of KCl and CsCl as described in the figure. Data are presented as means of three independent cultures, and error bars represent standard deviations.

**Table S1** The phylotypes detected in the soil and the enrichment cultures.

| Phylogenetic group         | Phylotype | Closest relative (Similarity, %)                             | Number of clones |    |     |      |      |       |
|----------------------------|-----------|--------------------------------------------------------------|------------------|----|-----|------|------|-------|
|                            |           |                                                              | Soil             | FB | 50K | 200K | 50Cs | 200Cs |
| <i>Alphaproteobacteria</i> | HS01      | AB121773 <i>Bradyrhizobium</i> sp. Shinshu-th2 (94)          | 4                |    |     |      |      |       |
|                            | HS02      | FI859687 <i>Ochrobactrum pseudogrignomense</i> BIHB 340 (99) |                  |    |     |      |      | 4     |
|                            | HS03      | AF395032 <i>Sphingomonas</i> sp. SIA181-1A1 (99)             | 2                |    |     |      |      |       |
|                            | HS04      | GQ369056 <i>Azospirillum</i> sp. T2-YC6788 (96)              | 1                |    |     |      |      |       |
|                            | HS05      | GU269549 <i>Pedomicrobium manganicum</i> ATCC 33121 (96)     | 1                |    |     |      |      |       |
|                            | HS06      | AJ563927 <i>Methylocella palustris</i> H4 (91)               | 1                |    |     |      |      |       |
|                            | HS07      | AM412118 <i>Chelatococcus</i> sp. P-117 (94)                 | 1                |    |     |      |      |       |
|                            | HS08      | JN674090 <i>Comamonas</i> sp. p19 (100)                      |                  |    | 3   |      | 2    |       |
|                            | HS09      | HM044161 <i>Ferroplasma myxofaciens</i> P3G (90)             | 1                |    |     |      |      |       |
|                            | HS10      | AB649026 <i>Variovorax ginsengisoli</i> S32319 (96)          | 1                |    |     |      |      |       |
| <i>Betaproteobacteria</i>  | HS11      | HQ005420 <i>Variovorax paradoxus</i> HB44 (98)               | 1                |    |     |      |      |       |
|                            | HS12      | AJ551104 <i>Burkholderia</i> sp. wp26 (93)                   |                  |    |     |      |      | 1     |
|                            | HS13      | NR_028719 <i>Comamonas terrigena</i> IMI 359870 (99)         |                  |    |     | 1    |      |       |
|                            | HS14      | KC195874 <i>Pseudomonas putida</i> BF111 (99)                | 4                |    | 18  | 2    |      |       |
|                            | HS15      | EU337121 <i>Acinetobacter johnsonii</i> 3B2 (99)             | 3                |    |     |      | 11   |       |
|                            | HS16      | DQ133596 <i>Pantoea agglomerans</i> B1 (99)                  | 5                |    | 5   | 2    |      |       |
|                            | HS17      | HM854373 <i>Enterobacter cloacae</i> P04 (99)                | 5                |    | 1   | 5    |      |       |
|                            | HS18      | HM231274 <i>Raoultella ornithinolytica</i> NB1 (99)          | 2                |    | 3   | 1    |      |       |
|                            | HS19      | EF520801 <i>Erwinia</i> sp. AJEY28 (98)                      | 2                |    | 1   | 1    |      |       |
|                            | HS20      | AF506040 <i>Pseudomonas fluorescens</i> LCSA0TU1 (99)        | 2                |    | 1   |      |      |       |
| <i>Gammaproteobacteria</i> | HS21      | X60411 <i>Aeromonas eucrenophila</i> NCIMB 74 (99)           | 1                |    |     |      |      | 2     |
|                            | HS22      | JQ267508 <i>Enterobacter aerogenes</i> ger-BHI10 (99)        |                  |    |     | 3    |      |       |
|                            | HS23      | FM164626 <i>Pseudomonas</i> sp. PC IW 25 (98)                |                  |    |     | 2    |      |       |

**Table S1.** Continued.

| Phylogenetic group         | Phylotype                  | Closest relative (Similarity, %)                     | Number of clones                                  |    |     |      |      |       |
|----------------------------|----------------------------|------------------------------------------------------|---------------------------------------------------|----|-----|------|------|-------|
|                            |                            |                                                      | Soil                                              | FB | 50K | 200K | 50Cs | 200Cs |
| <i>Gammaproteobacteria</i> | HS24                       | GU586313 <i>Stenotrophomonas rhizophila</i> IR (99)  |                                                   |    | 2   |      |      |       |
|                            | HS25                       | AY234531 <i>Bacterium</i> Ellin5114 (94)             | 1                                                 |    |     |      |      |       |
|                            | HS26                       | FN554396 <i>Gamma proteobacterium</i> CH43 (91)      | 1                                                 |    |     |      |      |       |
|                            | HS27                       | FI940849 <i>Aeromonas veronii</i> CYJ205 (97)        |                                                   |    | 1   |      |      |       |
|                            | HS28                       | HQ132731 <i>Leclercia adecarboxylata</i> Ld1 (98)    |                                                   | 1  |     |      |      |       |
|                            | HS29                       | JQ954967 <i>Serratia</i> sp. ZI-2 (96)               |                                                   | 1  |     |      |      |       |
|                            | HS30                       | EU304285 <i>Pseudomonas</i> sp. 73 (92)              |                                                   | 1  |     |      |      |       |
|                            | HS31                       | FR687005 <i>Aeromonas hydrophila</i> Pa031 (96)      |                                                   |    | 1   |      |      |       |
|                            | HS32                       | JX899634 <i>Pseudomonas</i> sp. REP-amp_124 (95)     |                                                   |    |     | 1    |      |       |
|                            | HS33                       | HQ407278 <i>Enterobacter cancerogenus</i> H103 (99)  |                                                   |    |     | 1    |      |       |
|                            | HS43                       | KC213922 <i>Leucobacter komagatae</i> Z3_S (97)      |                                                   |    |     | 1    |      |       |
|                            | HS34                       | HQ436039 <i>Aeromonas</i> sp. MDCC2473 (96)          |                                                   |    |     |      | 1    |       |
|                            | <i>Deltaproteobacteria</i> | HS35                                                 | JQ346737 <i>Syntrophus gentianae</i> HOGGOe1 (86) | 2  |     |      |      |       |
| HS36                       |                            | AJ233940 <i>Chondromyces pediculatus</i> Cm p17 (85) | 1                                                 |    |     |      |      |       |
| HS37                       |                            | GU249611 <i>Sorangineae bacterium</i> SBSr004 (82)   | 1                                                 |    |     |      |      |       |
| HS38                       |                            | CP002297 <i>Desulfovibrio vulgaris</i> RCH1 (81)     | 1                                                 |    |     |      |      |       |
| HS39                       |                            | HF543825 <i>Kofleria flava</i> DSM114620 (87)        | 1                                                 |    |     |      |      |       |

**Table S1.** Continued.

| Phylogenetic group   | Phylotype | Closest relative (Similarity, %)                           | Number of clones |    |     |      |      |       |
|----------------------|-----------|------------------------------------------------------------|------------------|----|-----|------|------|-------|
|                      |           |                                                            | Soil             | FB | 50K | 200K | 50Cs | 200Cs |
| <i>Bacteroidetes</i> | HS40      | HM627539 <i>Flavobacterium chungbukense</i> CS100 (99)     |                  |    | 2   |      | 10   | 36    |
|                      | HS41      | HQ882702 <i>Flavobacterium denitrificans</i> JS14-1 (99)   | 1                | 3  | 1   | 1    | 10   | 2     |
|                      | HS42      | NR_040953 <i>Sphingobacterium multivorum</i> IAMI4316 (99) |                  |    | 1   | 2    | 7    |       |
|                      | HS43      | AY468484 <i>Chryseobacterium</i> sp. LDVH 3 (99)           |                  | 5  | 1   |      |      |       |
|                      | HS44      | AB308367 <i>Bacterium</i> TG141 (91)                       | 2                |    |     |      |      |       |
|                      | HS45      | AY436806 <i>Bacteroidetes</i> bacterium RD4.3 (99)         |                  |    | 2   |      |      |       |
|                      | HS46      | HQ154576 <i>Wautersiella falsenii</i> R9-5A (96)           |                  |    |     |      | 2    |       |
|                      | HS47      | EU917053 <i>Niastella</i> sp. RHYL-67 (96)                 | 1                |    |     |      |      |       |
|                      | HS48      | AM411962 <i>Sphingobacterium</i> sp. P-38 (95)             | 1                |    |     |      |      |       |
|                      | HS49      | AB308369 <i>Bacterium</i> TG124 (95)                       | 1                |    |     |      |      |       |
|                      | HS50      | EF647593 <i>Adhaeribacter</i> sp. KS35 (99)                | 1                |    |     |      |      |       |
|                      | HS51      | AB682234 <i>Flavobacterium glycyces</i> NBRC 105008 (99)   |                  | 1  |     |      |      |       |
|                      | HS52      | AY538269 <i>Bacteroidetes</i> bacterium M2 (97)            |                  |    |     | 1    |      |       |
|                      | HS53      | JN020634 <i>Bacillus thuringiensis</i> (99)                |                  |    |     | 10   |      | 7     |
|                      | HS54      | FI970034 <i>Exiguobacterium acetylicum</i> QD-3 (99)       |                  | 3  | 2   |      |      |       |
|                      | HS55      | JQ943914 <i>Lysinibacillus fusiformis</i> H5 (99)          |                  | 1  |     | 3    |      |       |
|                      | HS56      | AB376084 <i>Paenibacillus</i> sp. YT0147 (83)              | 1                |    |     |      |      |       |
|                      | HS57      | EF101552 <i>Bacillus psychrodurans</i> KOPR124934 (98)     |                  |    |     |      |      | 1     |

**Table S1.** Continued.

| Phylogenetic group      | Phylotype | Closest relative (Similarity, %)                           | Number of clones |    |     |      |      |       |
|-------------------------|-----------|------------------------------------------------------------|------------------|----|-----|------|------|-------|
|                         |           |                                                            | Soil             | FB | 50K | 200K | 50Cs | 200Cs |
| <i>Actinobacteria</i>   | HS58      | AY211130 <i>Arthrobacter protophormiae</i> Mali 36 (98)    |                  |    |     |      | 8    |       |
|                         | HS59      | AB021325 <i>Bacterium</i> r17 (93)                         | 1                |    |     |      |      |       |
|                         | HS60      | AY673309 <i>Acidimicrobidae</i> bacterium Ellin7143 (91)   | 1                |    |     |      |      |       |
|                         | HS61      | NR_041871 <i>Nocardia cummideiens</i> DSM 44490 (99)       | 1                |    |     |      |      |       |
|                         | HS62      | JX949768 <i>Compostimonas</i> sp. MDB2-25 (97)             | 1                |    |     |      |      |       |
|                         | HS63      | JF423906 <i>Gaiella occulta</i> F2-233 (90)                | 1                |    |     |      |      |       |
|                         | HS64      | HM748674 <i>Bacterium</i> Ellin6526 (98)                   | 1                |    |     |      |      |       |
|                         | HS65      | JF707525 <i>Acidobacteria</i> bacterium UCL-085 (91)       | 2                |    |     |      |      |       |
| <i>Acidobacteria</i>    | HS66      | HM748653 <i>Bacterium</i> Ellin6505 (94)                   | 1                |    |     |      |      |       |
|                         | HS67      | HM748677 <i>Bacterium</i> Ellin6529 (94)                   | 1                |    |     |      |      |       |
|                         | HS68      | DQ075304 <i>Bacterium</i> Ellin640 (95)                    | 1                |    |     |      |      |       |
|                         | HS69      | HMI54525 <i>Gemmatimonadetes</i> bacterium KBS708 (85)     | 1                |    |     |      |      |       |
| <i>Gemmatimonadetes</i> | HS70      | NR_074708 <i>Gemmatimonas aurantiaca</i> T-27 (84)         | 1                |    |     |      |      |       |
|                         | HS71      | FJ405899 <i>Verrucomicrobia</i> bacterium WSF2-44 (90)     | 1                |    |     |      |      |       |
| <i>Verrucomicrobia</i>  | HS72      | AB245341 <i>Spartrobacteria</i> bacterium Gsoil 133 (93)   | 1                |    |     |      |      |       |
|                         | HS73      | NR_074379 <i>Sphaerobacter thermophilus</i> DSM 20745 (83) | 1                |    |     |      |      |       |
| <i>Planctomycetes</i>   | HS74      | FJ405890 <i>Planctomycetacia</i> bacterium WSF3-27 (86)    | 1                |    |     |      |      |       |
| Total                   |           |                                                            | 46               | 45 | 48  | 46   | 45   | 48    |
